# Supplementary material for: Stabilization of lithium metal in concentrated electrolytes: effects of electrode potential and solid electrolyte interphase formation
Source: Royal Society of Chemistry journal article supplement (doi:10.1039/d4fd00038b), 2024-01-01
Supplement: d4fd00038b1.pdf [file d4fd00038b1.pdf]

## Supporting Information

### **Stabilization of lithium metal in concentrated electrolytes: effects of electrode potential and solid electrolyte interphase formation**

Anusha Pradhan<sup>1</sup>, Shoma Nishimura<sup>1</sup>, Yasuyuki Kondo<sup>1</sup>, Tomoaki Kaneko<sup>2</sup>, Yu Katayama<sup>1</sup>, Keitaro Sodeyama<sup>3</sup>, Yuki Yamada<sup>1,\*</sup>

<sup>1</sup>SANKEN, Osaka University, 8-1, Mihogaoka, Ibaraki, Osaka 567-0047, Japan

<sup>2</sup>Department of Computational Science and Technology, Research Organization for Information Science and Technology (RIST), 1-18-16, Hamamatsucho, Minato-ku, Tokyo 105-0013, Japan

<sup>3</sup>Center for Basic Research on Materials, National Institute for Materials Science (NIMS), 1-1, Namiki, Tsukuba, Ibaraki 305-0044, Japan

\*Corresponding author: [yamada@sanken.osaka-u.ac.jp](mailto:yamada@sanken.osaka-u.ac.jp)

Table S1 Li electrode potential ( $E_{Li}$ ) with reference to Fc/Fc<sup>+</sup> extracted from cyclic voltammograms (Fig. S1) in two or three cells for each electrolyte

| LiFSI:DEE<br>molar ratio | Molality<br>(m) | Molarity<br>(M) | $E_{Li}$<br>(V vs. Fc/Fc <sup>+</sup> ) |         |         |         |
|--------------------------|-----------------|-----------------|-----------------------------------------|---------|---------|---------|
|                          |                 |                 | Cell #1                                 | Cell #2 | Cell #3 | Average |
| 1:71                     | 0.12            | 0.10            | -3.42                                   | -3.44   | -3.47   | -3.44   |
| 1:14                     | 0.60            | 0.50            | -3.36                                   | -3.35   | -3.36   | -3.36   |
| 1:6.6                    | 1.3             | 1.0             | -3.34                                   | -3.33   | -3.33   | -3.33   |
| 1:4.2                    | 2.0             | 1.5             | -3.31                                   | -3.31   | -3.31   | -3.31   |
| 1:3.0                    | 2.8             | 2.0             | -3.29                                   | -3.28   | -3.29   | -3.29   |
| 1:1.8                    | 4.7             | 3.0             | -3.20                                   | -3.20   | -3.20   | -3.20   |
| 1:1.2                    | 7.1             | ~4.0            | -3.08                                   | -3.06   | -3.05   | -3.06   |
| 1:1.0                    | 8.5             | ~4.5            | -3.00                                   | -3.00   | -3.00   | -3.00   |
| 1:0.85                   | 10              | ~5.0            | -2.95                                   | -2.95   | -       | -2.95   |

Table S2 Chemical compositions, Li electrode potential ( $E_{Li}$ ), Raman peak position of S-N-S vibration of FSI<sup>-</sup>, and average Coulombic efficiency (CE) of Li plating/stripping during 2nd-20th cycles in LiFSI/DEE electrolytes

| <b>LiFSI:DEE molar ratio</b> | <b>Molality (m)</b> | <b>Molarity (M)</b> | <b><math>E_{Li}^*</math> (V vs. Fc/Fc<sup>+</sup>)</b> | <b>FSI<sup>-</sup> Raman peak (cm<sup>-1</sup>)</b> | <b>Li CE** (%)</b> |
|------------------------------|---------------------|---------------------|--------------------------------------------------------|-----------------------------------------------------|--------------------|
| 1:71                         | 0.12                | 0.10                | -3.44                                                  | -                                                   | 19.6               |
| 1:14                         | 0.60                | 0.50                | -3.36                                                  | -                                                   | -                  |
| 1:6.6                        | 1.3                 | 1.0                 | -3.33                                                  | 721                                                 | 93.7               |
| 1:4.2                        | 2.0                 | 1.5                 | -3.31                                                  | 722                                                 | -                  |
| 1:3.0                        | 2.8                 | 2.0                 | -3.29                                                  | 723                                                 | 95.6               |
| 1:1.8                        | 4.7                 | 3.0                 | -3.20                                                  | 728                                                 | 96.3               |
| 1:1.2                        | 7.1                 | ~4.0                | -3.06                                                  | 741                                                 | 96.1               |
| 1:1.0                        | 8.5                 | ~4.5                | -3.00                                                  | 744                                                 | -                  |
| 1:0.85                       | 10                  | ~5.0                | -2.95                                                  | -                                                   | 96.3               |

\*For  $E_{Li}$ , the average values obtained in two or three cells are shown.

\*\*For Li CE, the average values obtained in three cells (Table S3) are shown.

Table S3 Average Coulombic efficiency (CE) of Li plating/stripping during 2nd-20th cycles in three Cu|Li cells for each LiFSI/DEE electrolyte

| LiFSI:DEE<br>molar ratio | Molality<br>(m) | Molarity<br>(M) | Average Li CE during 2nd-20th cycles<br>(%) |         |         |         |
|--------------------------|-----------------|-----------------|---------------------------------------------|---------|---------|---------|
|                          |                 |                 | Cell #1                                     | Cell #2 | Cell #3 | Average |
| 1:71                     | 0.12            | 0.10            | 16.6                                        | 21.7    | 20.4    | 19.6    |
| 1:6.6                    | 1.3             | 1.0             | 93.6                                        | 93.7    | 93.8    | 93.7    |
| 1:3.0                    | 2.8             | 2.0             | 95.4                                        | 95.5    | 96.0    | 95.6    |
| 1:1.8                    | 4.7             | 3.0             | 96.1                                        | 96.4    | 96.5    | 96.3    |
| 1:1.2                    | 7.1             | ~4.0            | 95.5                                        | 95.9    | 96.8    | 96.1    |
| 1:0.85                   | 10              | ~5.0            | 95.6                                        | 96.5    | 96.9    | 96.3    |

Table S4 Details of liquid model used in the DFT-MD

|                               | <b>Dilute</b> | <b>Concentrated</b> |
|-------------------------------|---------------|---------------------|
| LiFSI:DEE molar ratio         | 10            | 1:2                 |
| Density (g cm <sup>-3</sup> ) | 0.92          | 1.17                |
| # mol. (Solv/Anion)           | 77 (70/7)     | 99 (66/33)          |
| #Atoms                        | 1610          | 1782                |
| Lx (Angstrom)                 | 25.860        | 22.068              |

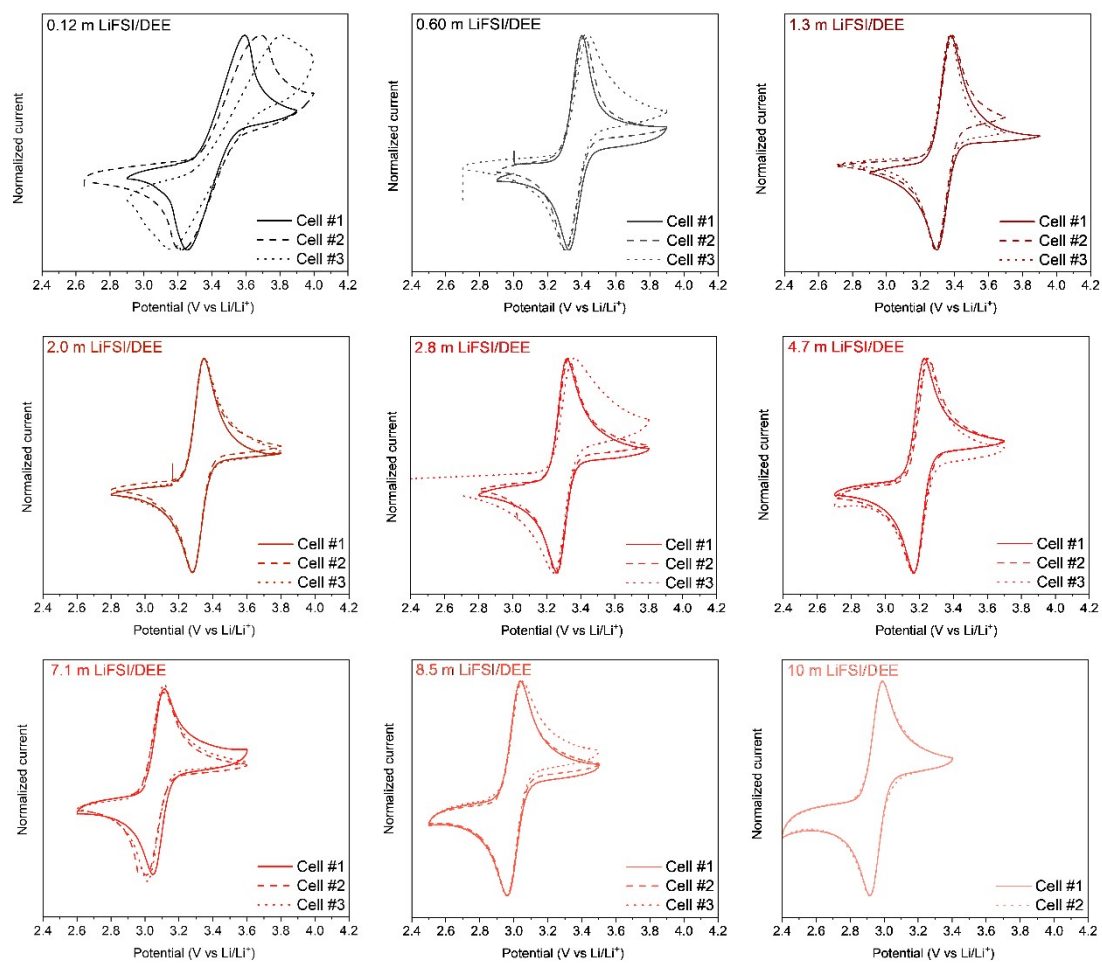

Fig. S1 Cyclic voltammograms (scan rate:  $5 \text{ mV s}^{-1}$ ) of Fc/Fc<sup>+</sup> redox in LiFSI/DEE at various LiFSI salt concentrations. 1 mM Fc was introduced in each electrolyte. Two or three cells were assembled for each electrolyte and subjected to cyclic voltammetry.

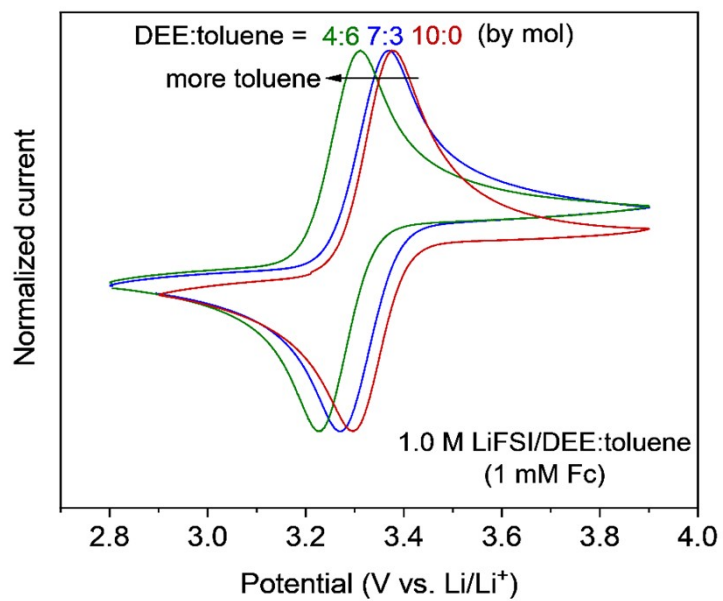

Fig. S2 Cyclic voltammograms (scan rate: 5 mV s<sup>-1</sup>) of Fc/Fc<sup>+</sup> redox on Pt electrode in 1.0 M LiFSI/DEE:toluene at various DEE:toluene molar ratios. An electrolyte with the highest amount of non-solvating toluene (DEE:toluene = 4:6 by mol) shows the highest  $E_{Li}$  of -3.26 V vs. Fc/Fc<sup>+</sup>.

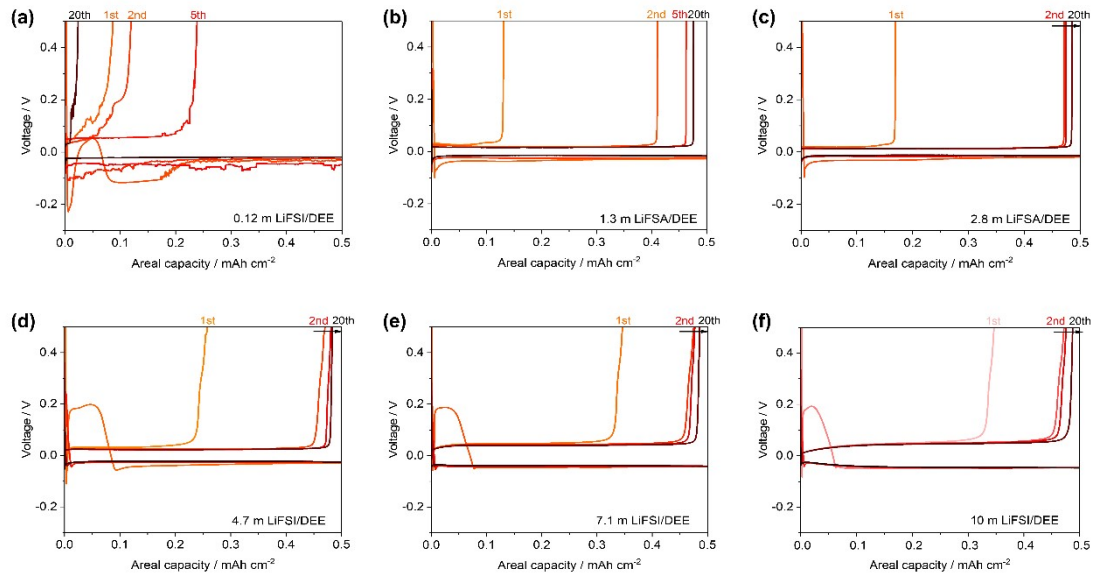

Fig. S3 Charge-discharge curves of Cu|Li cells with (a) 0.12 m, (b) 1.3 m, (c) 2.8 m, (d) 4.7 m, (e) 7.1 m, and (f) 10 m LiFSI/DEE in 1st, 2nd, 5th, and 20th cycles. The applied constant current was 0.5 mA cm<sup>-2</sup>. Li was plated for 1 h, followed by Li stripping up to 0.5 V.
